# Supplementary material
Source: PubMed Central journal article supplement (PMC4243994)
Supplement: pro0023-1220-sd1.pdf [file pro0023-1220-sd1.pdf]

Supplemental Figures are available at: <http://prodata.swmed.edu/HCOH>

Supplemental Figure S1: [http://prodata.swmed.edu/HCOH/Figure\\_S1\\_HCOH-s1\\_alns](http://prodata.swmed.edu/HCOH/Figure_S1_HCOH-s1_alns)

Supplemental Figure S2: [http://prodata.swmed.edu/HCOH/Figure\\_S2\\_HCOH-s2\\_alns](http://prodata.swmed.edu/HCOH/Figure_S2_HCOH-s2_alns)

Supplemental Figure S3: [http://prodata.swmed.edu/HCOH/Figure\\_S3\\_HCOH-t1\\_alns](http://prodata.swmed.edu/HCOH/Figure_S3_HCOH-t1_alns)

Supplemental Figure S4: [http://prodata.swmed.edu/HCOH/Figure\\_S4\\_HCOH-t2\\_alns](http://prodata.swmed.edu/HCOH/Figure_S4_HCOH-t2_alns)

Supplemental Figure S5: [http://prodata.swmed.edu/HCOH/Figure\\_S5\\_HCOH-t3\\_alns](http://prodata.swmed.edu/HCOH/Figure_S5_HCOH-t3_alns)

Supplemental Figure S6: [http://prodata.swmed.edu/HCOH/Figure\\_S6\\_HCOH-t4\\_alns](http://prodata.swmed.edu/HCOH/Figure_S6_HCOH-t4_alns)

Supplemental Figure S7: [http://prodata.swmed.edu/HCOH/Figure\\_S7\\_HCOH-t5\\_alns](http://prodata.swmed.edu/HCOH/Figure_S7_HCOH-t5_alns)

Supplemental Figure S8: [http://prodata.swmed.edu/HCOH/Figure\\_S8\\_HCOH-t6\\_alns](http://prodata.swmed.edu/HCOH/Figure_S8_HCOH-t6_alns)

Supplemental Figure S9: [http://prodata.swmed.edu/HCOH/Figure\\_S9\\_HCOH-t7\\_alns](http://prodata.swmed.edu/HCOH/Figure_S9_HCOH-t7_alns)

Supplemental Figure S10: [http://prodata.swmed.edu/HCOH/Figure\\_S10\\_clans.html](http://prodata.swmed.edu/HCOH/Figure_S10_clans.html)

Supplemental Figure S11: [http://prodata.swmed.edu/HCOH/Figure\\_S11\\_A- and B-type HCO\\_alns](http://prodata.swmed.edu/HCOH/Figure_S11_A- and B-type HCO_alns)

Supplemental Figure S12: [http://prodata.swmed.edu/HCOH/Figure\\_S12\\_C-type HCO\\_alns](http://prodata.swmed.edu/HCOH/Figure_S12_C-type HCO_alns)

Supplemental Figure S13: [http://prodata.swmed.edu/HCOH/Figure\\_S13\\_NOR\\_alns](http://prodata.swmed.edu/HCOH/Figure_S13_NOR_alns)

Supplemental Figure S14: [http://prodata.swmed.edu/HCOH/Figure\\_S14\\_HCO-noHH1\\_alns](http://prodata.swmed.edu/HCOH/Figure_S14_HCO-noHH1_alns)

Supplemental Figure S15: [http://prodata.swmed.edu/HCOH/Figure\\_S15\\_HCO-noHH2\\_alns](http://prodata.swmed.edu/HCOH/Figure_S15_HCO-noHH2_alns)

Supplemental Figure S16: [http://prodata.swmed.edu/HCOH/Figure\\_S16\\_HCO-xxx1\\_alns](http://prodata.swmed.edu/HCOH/Figure_S16_HCO-xxx1_alns)

Supplemental Figure S17: [http://prodata.swmed.edu/HCOH/Figure\\_S17\\_HCO-xxx2\\_alns](http://prodata.swmed.edu/HCOH/Figure_S17_HCO-xxx2_alns)

Supplemental Figure S18: [http://prodata.swmed.edu/HCOH/Figure\\_S18\\_HCO-xxx3\\_alns](http://prodata.swmed.edu/HCOH/Figure_S18_HCO-xxx3_alns)

Supplemental Figure S19: [http://prodata.swmed.edu/HCOH/Figure\\_S19\\_HCO-xxx4\\_alns](http://prodata.swmed.edu/HCOH/Figure_S19_HCO-xxx4_alns)
